# Supplementary material for: Nanotechnology-based approaches for targeting and delivery of drugs via Hexakis (m-PE) macrocycles
Source: PubMed Central journal article supplement (PMC8050045; doi:10.1038/s41598-021-87011-6), 2021-04-15
Supplement: 41598_2021_87011_MOESM1_ESM.pdf [file 41598_2021_87011_MOESM1_ESM.pdf]

# Nanotechnology-Based Approaches for Targeting and Delivery of Drugs via Hexakis (m-PE) Macrocycles

Samaneh Pasban<sup>1</sup> and Heidar Raissi<sup>2\*</sup>

<sup>1</sup>Department of Chemistry, University of Birjand, Birjand, Iran

Tel: +985632502064, Email: samaneh\_pasban@birjand.ac.ir

<sup>2</sup>Department of Chemistry, University of Birjand, Birjand, Iran

Tel: +985632502064, Email: hraeisi@birjand.ac.ir

\* Corresponding E-mail: [hraeisi@birjand.ac.ir](mailto:hraeisi@birjand.ac.ir)

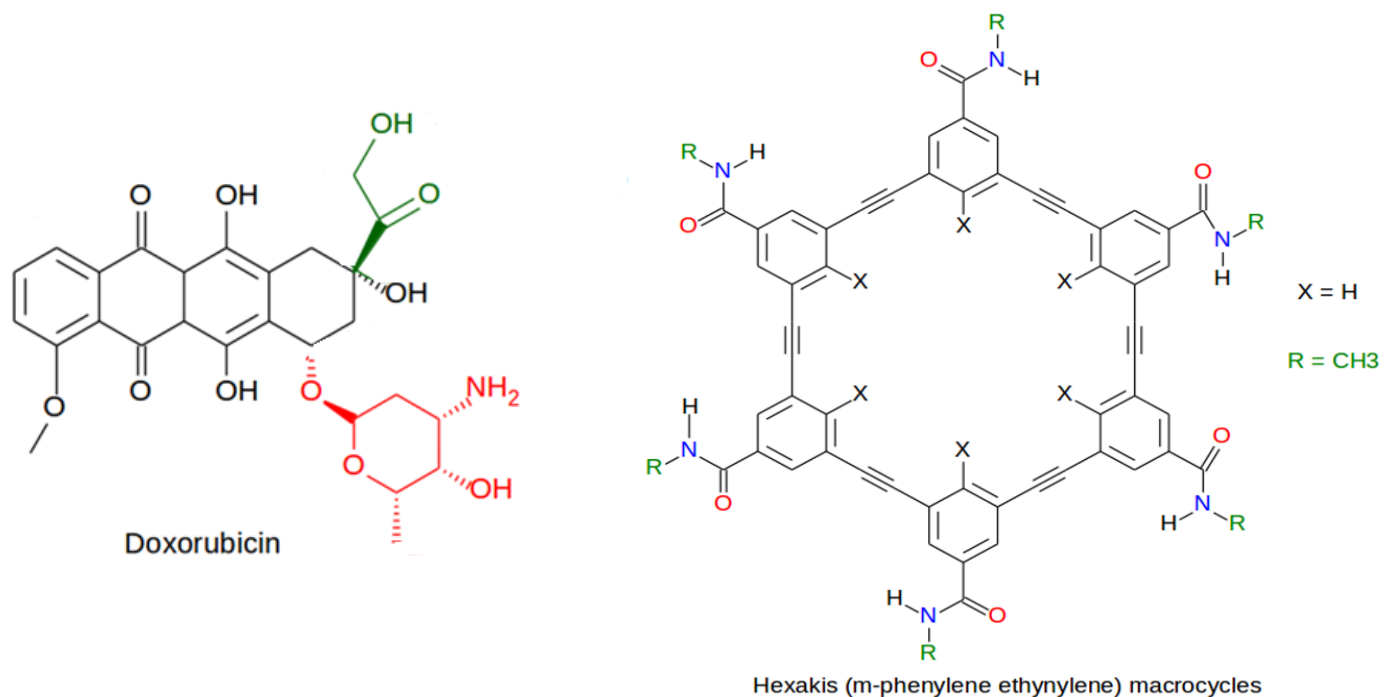

**Figure S1** – Molecular structures of doxorubicin (DOX) anticancer drug and hexakis (m-PE) monomer.

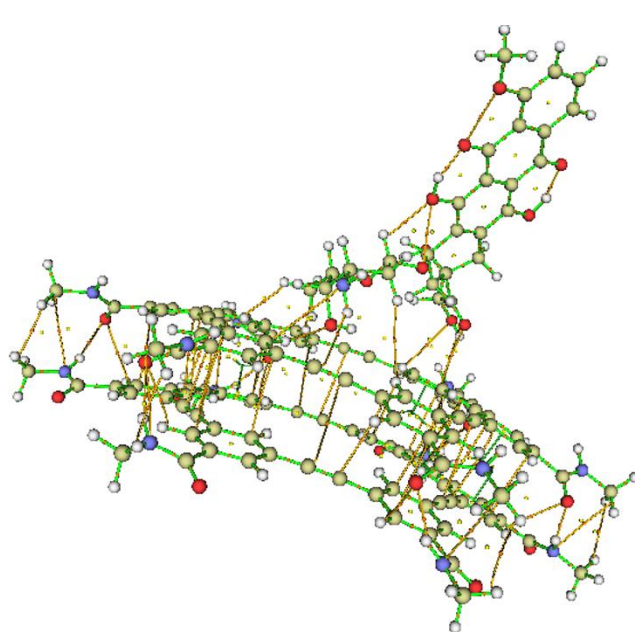

*Outside complex*

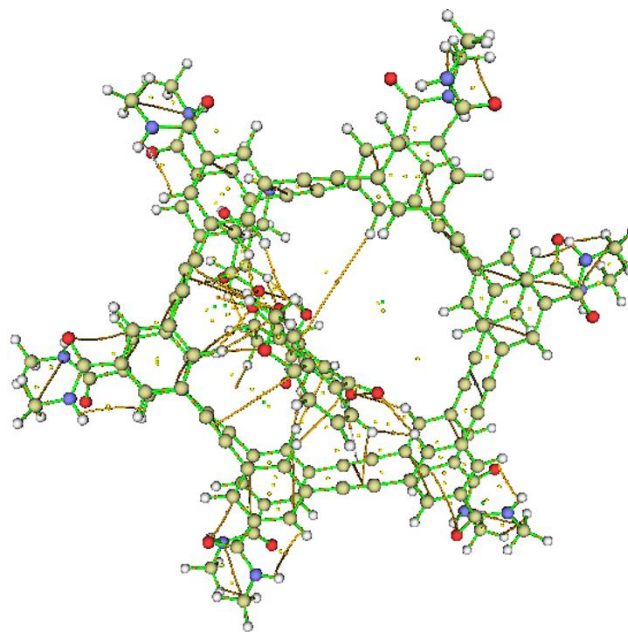

*Inside complex*

**Figure S2** – The molecular graph of the outside and inside complexes obtained from the DFT calculation.

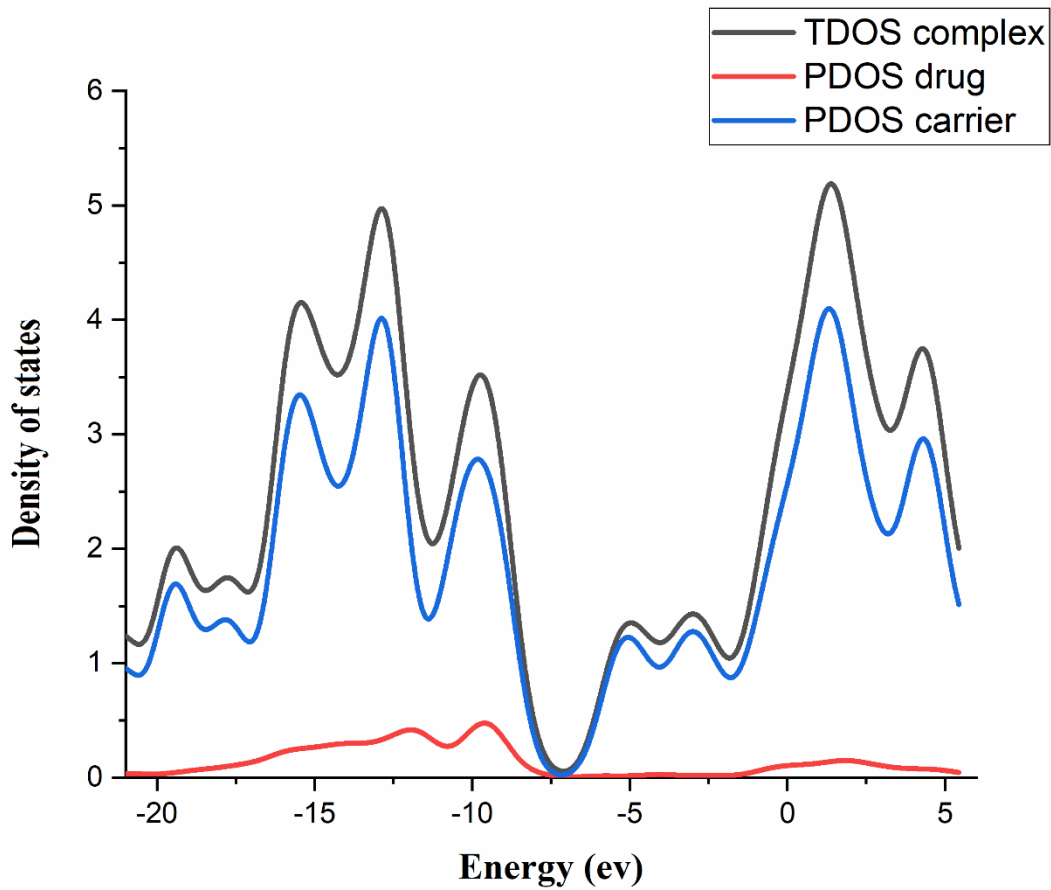

**Figure S3** – The calculated electronic density of states for free DOX drug, hexakis dimer carrier, and their complex.

**Table. S1** – The calculated average distance between the N and O atoms and average H-bond length (Å) in water and chloroform for each monomer<sup>a</sup> and hexakis dimer.

| <i>Hexakis dimer</i> | <i>Adsorption site</i> | <i>Distance Å</i> |
|----------------------|------------------------|-------------------|
| <i>Chloroform</i>    | O115-H109              | 1.986             |
|                      |                        | 2.025             |
| <i>Water</i>         | O132-H105              | 1.987             |
|                      |                        | 2.007             |
|                      | O149-H101              | 1.991             |
|                      |                        | 2.020             |
|                      | O137-H97               | 1.988             |
|                      |                        | 2.020             |
|                      | O127-H125              | 1.979             |
|                      |                        | 1.999             |
|                      | O119-H113              | 1.989             |
|                      |                        | 2.012             |
|                      | N...O                  | 2.941             |
|                      |                        | 2.947             |
|                      | N-H                    | 1.338(1.328)      |
|                      |                        | 1.345(1.331)      |
| C=O                  | 1.012(1.00)            |                   |
|                      | 1.023(1.011)           |                   |

<sup>a</sup>Values in parentheses refer to calculation for each monomer

**Table S2.** Computed equilibrium bond lengths (units in Å) at the binding sites of DOX/hexakis dimer complexes in chloroform and water solvents. Atom labels are defined in Fig.2.

| <i>Model</i>             | <i>Adsorption site</i>             | <i>Distance</i> |
|--------------------------|------------------------------------|-----------------|
| <i>Inside complexes</i>  | O <sub>237</sub> -H <sub>216</sub> | 2.68            |
|                          |                                    | 2.72*           |
|                          | O <sub>238</sub> -H <sub>210</sub> | 2.21            |
|                          |                                    | 2.24*           |
|                          | O <sub>234</sub> -H <sub>196</sub> | 2.27            |
|                          |                                    | 2.29*           |
|                          | O <sub>237</sub> -H <sub>296</sub> | 2.39            |
|                          |                                    | 2.42*           |
|                          | O <sub>233</sub> -H <sub>206</sub> | 2.28            |
|                          |                                    | 2.31*           |
| <i>Outside complexes</i> | O <sub>229</sub> -H <sub>288</sub> | 2.05            |
|                          |                                    | 2.1*            |
|                          | O <sub>39</sub> -H <sub>185</sub>  | 3.6             |
|                          |                                    | 3.91*           |
|                          | O <sub>33</sub> -H <sub>284</sub>  | 2.2             |
|                          |                                    | 2.34*           |
|                          | O <sub>37</sub> -H <sub>277</sub>  | 2.9             |
|                          |                                    | 3.2*            |
|                          | N <sub>34</sub> -H <sub>283</sub>  | 3.9             |
|                          |                                    | 4.2*            |

\* In water solvent.

**Table S3.** The selected topological parameters of the investigated complexes, the density of the total energy of electrons ( $H_{BCP}$ ), the kinetic ( $G_{BCP}$ ) and potential ( $V_{BCP}$ ) electron energy densities (all in a.u.),  $-G_{BCP}/V_{BCP}$  ratio and the hydrogen bond energy ( $E_{HB}$ , in kJ/mol) for the intermolecular interactions between DOX drug and hexakis dimer in chloroform and water solution.

|                          | <i>Site adsorption</i>             | $\rho_{BCP}$ | $\nabla^2\rho_{BCP}$ | $G_{BCP}$ | $V_{BCP}$ | $H_{BCP}$ | $-G_{BCP}/V_{BCP}$ | $E_{HB}$ |
|--------------------------|------------------------------------|--------------|----------------------|-----------|-----------|-----------|--------------------|----------|
| <b>Inside complexes</b>  | O <sub>239</sub> -H <sub>216</sub> | 0.01661      | 0.0505               | 0.01160   | -0.0105   | 0.00101   | 1.0960             | -13.901  |
|                          |                                    | 0.01658      | 0.0502               | 0.01154   | -0.0105   | 0.00100   | 1.0950             | -13.843* |
|                          | O <sub>238</sub> -H <sub>210</sub> | 0.01634      | 0.0574               | 0.01267   | -0.0109   | 0.00167   | 1.1526             | -14.431  |
|                          |                                    | 0.00817      | 0.0294               | 0.00588   | -0.0044   | 0.00146   | 1.3323             | -5.795*  |
|                          | O <sub>234</sub> -H <sub>196</sub> | 0.0138       | 0.0457               | 0.00996   | -0.0085   | 0.00146   | 1.1720             | -11.158  |
|                          |                                    | 0.00649      | 0.0265               | 0.00508   | -0.0035   | 0.00153   | 1.4332             | -4.659*  |
|                          | O <sub>237</sub> -H <sub>296</sub> | 0.0118       | 0.0453               | 0.00935   | -0.0073   | 0.00196   | 1.2659             | -9.7046  |
|                          |                                    | 0.00101      | 0.0156               | 0.00263   | -0.0013   | 0.00126   | 1.9326             | -1.786*  |
|                          | O <sub>233</sub> -H <sub>206</sub> | 0.01307      | 0.0463               | 0.0098    | -0.0081   | 0.00171   | 1.2105             | -10.692  |
|                          |                                    | 0.00583      | 0.0202               | 0.00392   | -0.0028   | 0.00112   | 1.3999             | -3.683*  |
| <b>Outside complexes</b> | O <sub>229</sub> -H <sub>288</sub> | 0.01939      | 0.0691               | 0.01564   | -0.0140   | 0.00163   | 1.1165             | -18.39   |
|                          |                                    | 0.01921      | 0.0614               | 0.01429   | -0.0132   | 0.00105   | 1.0796             | -17.381* |
|                          |                                    |              |                      |           |           |           |                    |          |
|                          | O <sub>39</sub> -H <sub>185</sub>  | 0.0201       | 0.0809               | 0.01786   | -0.0155   | 0.00236   | 1.1524             | -20.347  |
|                          |                                    | 0.02239      | 0.0702               | 0.01693   | -0.0163   | 0.00061   | 1.0374             | -21.431* |
|                          | O <sub>33</sub> -H <sub>284</sub>  | 0.0204       | 0.0813               | 0.01803   | -0.0157   | 0.00228   | 1.1451             | -20.677  |
|                          |                                    | 0.02142      | 0.0698               | 0.0165    | -0.0155   | 0.0009    | 1.0610             | -20.413* |
|                          | O <sub>37</sub> -H <sub>277</sub>  | 0.02389      | 0.0989               | 0.02231   | -0.0199   | 0.00240   | 1.1209             | -26.134  |
|                          |                                    | 0.02251      | 0.0711               | 0.01713   | -0.0164   | 0.0006    | 1.0388             | -21.652* |
|                          | N <sub>34</sub> -H <sub>283</sub>  | 0.0508       | 0.01646              | 0.02315   | -0.0421   | -0.0190   | 0.5487             | -55.382  |
|                          | 0.0501                             | 0.0121       | 0.02196              | -0.0409   | -0.0189   | 0.5369    | -53.685*           |          |

\* In water solvent.

**Table S4.** The DOX optimized structural geometries in vacuum phase and experimental data<sup>22</sup>.

Lengths are in angstrom (Å)

|                | <b>EXP<sup>22</sup></b> | <b>DFT/6-31G**</b> | <b>%SD</b> |
|----------------|-------------------------|--------------------|------------|
| <i>C2-C3</i>   | 1.32 <sup>c</sup>       | 1.35               | 1.5151     |
| <i>C2-C1</i>   | 1.39 <sup>c</sup>       | 1.36               | -1.1582    |
| <i>C1-C16</i>  | 1.40 <sup>c</sup>       | 1.39               | -0.7142    |
| <i>C15-C16</i> | 1.36 <sup>c</sup>       | 1.37               | 0.7352     |
| <i>C4-C15</i>  | 1.42 <sup>c</sup>       | 1.40               | -1.4084    |
| <i>C3-H3</i>   | 0.98 <sup>c</sup>       | 1.00               | 2.0408     |
| <i>C4-C3</i>   | 1.41 <sup>c</sup>       | 1.40               | -0.7092    |
| <i>C2-H2</i>   | 1.01 <sup>c</sup>       | 1.02               | -0.9803    |
| <i>C4-O4</i>   | 1.34 <sup>c</sup>       | 1.34               | 0          |
| <i>O4-C23</i>  | 1.46 <sup>c</sup>       | 1.44               | -1.3698    |
| <i>C5-F5</i>   | 1.34 <sup>c</sup>       | 1.33               | -0.7462    |
| <i>C23-H23</i> | 1.16 <sup>c</sup>       | 1.13               | -2.5862    |
| <i>C5-C15</i>  | 1.50 <sup>c</sup>       | 1.47               | -1.9087    |
| <i>C17-C18</i> | 1.37 <sup>c</sup>       | 1.39               | 0.01459    |
| <i>C18-C12</i> | 1.46 <sup>c</sup>       | 1.47               | 0.6849     |
| <i>C12-C16</i> | 1.50 <sup>c</sup>       | 1.49               | -0.6666    |
| <i>C12-O12</i> | 1.25 <sup>c</sup>       | 1.20               | -4.00      |
| <i>C5-O5</i>   | 1.24 <sup>c</sup>       | 1.24               | 0          |
| <i>C6-C17</i>  | 1.40 <sup>c</sup>       | 1.38               | -0.7142    |
| <i>C19-C20</i> | 1.36 <sup>c</sup>       | 1.37               | 0.7352     |
| <i>C9-O9</i>   | 1.44 <sup>c</sup>       | 1.43               | -0.6944    |
| <i>O9-H9</i>   | 1.09 <sup>c</sup>       | 1.05               | -3.66      |
| <i>C10-H10</i> | 1.01 <sup>c</sup>       | 1.04               | 2.4798     |
| <i>C13-O13</i> | 1.20 <sup>c</sup>       | 1.21               | 0.8349     |
| <i>C14-H14</i> | 0.99 <sup>c</sup>       | 1.01               | 2.02       |
| <i>C13-C14</i> | 1.50 <sup>c</sup>       | 1.49               | -0.6666    |
| <i>N22-H22</i> | 1.00 <sup>c</sup>       | 0.99               | 1          |

<sup>c</sup> X-ray data (average for four molecules)

**Table S5.**  $^1\text{H}$  NMR chemical shifts ( $\delta$ , in ppm) obtained from the DFT calculation,  $^1\text{H}$  shifts relative to monomer and dimer of hexakis.

| <i>Type of H</i>                     | <i>Description of Proton</i>                                | <i>Hexakis dimer</i><br>$\delta$ (ppm) | <i>Hexakis monomer</i><br>$\delta$ (ppm) |
|--------------------------------------|-------------------------------------------------------------|----------------------------------------|------------------------------------------|
| <i>Ar-H</i>                          | <i>aromatic (H is on phenyl ring)</i>                       | 7.1                                    | 7.9                                      |
| <i>R CO NHR</i>                      | <i>amide</i>                                                | 8.2                                    | 9.08                                     |
| <i>R<sub>2</sub>N-CH<sub>3</sub></i> | <i><math>\alpha</math> to nitrogen (C is attached to N)</i> | 1.2                                    | 1.5                                      |
